# Supplementary material for: Collimator position optimization for proton minibeam radiation therapy
Source: Research Square preprint supplement (doi:10.21203/rs.3.rs-8768924/v1), 2026-02-16
Supplement: Supplementary file 1 [file c08e62323c15124e01f64e4a.docx]

**Supplementary material: Collimator position optimization for proton minibeam radiation therapy**

Nimita Shinde, Yuting Lin, and Hao Gao

Department of Radiation Oncology, University of Texas Southwestern Medical Center, Dallas, TX, USA

**Section A: Detailed description of objective function terms and weights**

This section provides a detailed explanation of the objective function used in Eq. (1) and Eq. (2) of the main manuscript, including the formulation of individual penalty terms and the corresponding weights used in the clinical test cases. The objective function is defined as

In Eq. (S1), the first term ensures dose conformity by minimizing the difference between delivered dose and the prescribed dose. The second to fifth terms correspond to DVH-max, DVH-min, D-max and D-mean constraints, respectively. These constraint definitions are described in detail in Section 2.1 of the main paper. Below, we outline the specific DVH parameters and weights used for the clinical test cases. Tables S1-S6 provide information about the six clinical test cases whose results are provided in Section 3 of the main paper.

Table S1: Objective function parameters and weights for HN01.

| **Objective term** | **Structure** | **Objective weight ()** | **Dose () (Gy)** |
| --- | --- | --- | --- |
| Dose conformity | Target | 1 | 40 |
| DVH-min1 | Target | 40 | 40 |
| DVH-max2 | Right parotid | 1 | 30 |
| D-max | Oropharynx | 1 | 20 |
| Larynx | 1 | 20 |
| Target | 40 | 44 |
| Body | 1 | 40 |
| D-mean | Oral cavity | 1 | 40 |
| 1Ensures at least 95% voxels receive prescribed dose | | | |
| 2Ensures at most 50% of brain voxels receive dose larger than *b* Gy | | | |

Table S2: Objective function parameters and weights for HN02.

| **Objective term** | **Structure** | **Objective weight ()** | **Dose () (Gy)** |
| --- | --- | --- | --- |
| Dose conformity | Target | 1 | 2.12 |
| DVH-min1 | Target | 10 | 2.12 |
| DVH-max2 | Right parotid | 1 | 0.91 |
| D-max | Mandible | 1 | 2.21 |
| Target | 1 | 2.33 |
| Body | 1 | 2.12 |
| D-mean | Left Parotid | 1 | 0.78 |
| Larynx | 1 | 0.97 |
| Esophagus | 1 | 0.66 |
| Mandible | 1 | 1.51 |
| Oral cavity | 1 | 1.06 |
| Lip | 1 | 0.45 |
| 1Ensures at least 95% voxels receive prescribed dose | | | |
| 2Ensures at most 50% voxels receive dose larger than dose Gy | | | |

Table S3: Objective function parameters and weights for abdomen.

| **Objective term** | **Structure** | **Objective weight ()** | **Dose () (Gy)** |
| --- | --- | --- | --- |
| Dose conformity | Target | 1 | 6 |
| DVH-min1 | Target | 10 | 6 |
| DVH-max2 | Large bowel | 1 | 6.25 |
| Small bowel | 1 | 5 |
| Left kidney | 1 | 3 |
| D-max | Large bowel | 1 | 9.5 |
| Small bowel | 1 | 8.75 |
| Spinal cord | 1 | 6.25 |
| Target | 1 | 6.6 |
| Body | 1 | 6 |
| 1Ensures at least 95% voxels receive prescribed dose | | | |
| 2Ensures at most 20 cm3 of large bowel, 5 cm3 of small bowel and  150 cm3 volume of left kidney receive dose larger than dose Gy | | | |
